# Supplementary material
Source: PubMed Central journal article supplement (PMC3053982)
Supplement: 1015098108_sapp.pdf [file 1015098108_sapp.pdf]

**Supporting Information Appendix For**  
**Modulation of behavioral phase changes in the migratory locust by the**  
**catecholamine metabolic pathway**

Zongyuan Ma, Wei Guo, Xiaojiao Guo, Xianhui Wang, Le Kang<sup>†</sup>

State Key Laboratory of Integrated Management of Pest Insects and Rodents, Institute of Zoology, Chinese Academy of Sciences, Beijing 100101, China

<sup>†</sup> To whom correspondence should be addressed. E-mail: [lkang@ioz.ac.cn](mailto:lkang@ioz.ac.cn)

## **Summary**

Supporting Methods

References

Supporting Figures (Fig.S1-S7)

Supporting Tables (Tab.S1-S5)

## **Supporting Methods**

### **RNA preparation**

In order to eliminate the heterogeneity of different samples, total RNA was extracted from head tissues that molts after 2-3 days following the protocol of RNAsy mini kit (Qiagen).

### **Isolation of gregarious nymphs**

The fourth-stadium gregarious nymphs on the second day after ecdysis were separately reared in the solitary rearing cages with food. After 0, 1, 4, 8, 16, 32 hours of treatments, head tissues of nymphs were dissected and put into the liquid nitrogen immediately for qPCR experiments.

### **Crowding of solitary nymphs**

Two fourth-stadium solitary locusts were introduced into the solitary rearing cage which contains 20 gregarious nymphs of the same developmental stage with food. Then, after stayed with the stimulus group for 0, 1, 4, 8, 16, 32 hours, head tissues of nymphs were dissected and put into the liquid nitrogen immediately for qPCR experiments.

### **Quantification of dopamine and serotonin in brain tissue extracts**

Dopamine and serotonin in the extracts of 10 brains (without optic lobes) were quantified with reverse-phase high performance liquid chromatography (HPLC) and mass spectrometry (MS) analysis. The brain tissues of the fourth-stadium gregarious and solitary nymphs were immediately dissected and stored in liquid nitrogen. 15 brains were homogenized using mortars and pestle that were pre-cooled by liquid nitrogen, transferred to 1.5ml Eppendorf tubes, and lysed in 200 $\mu$ l ice-cold 0.1 M perchloric acid on ice for 10min. The homogenate were centrifuged at 14000g for 10min at 4°C. The supernatant were filtered by 0.45  $\mu$ m filter, transferred to a second Eppendorf tube and stored at -80°C until MS analysis. 20 $\mu$ l supernatant were automatically loaded into Inlet Systems (Agilent Technologies 1200 Series RRLC) with a C18 reversed phase column (Eclipse Plus C18, 3.0  $\times$  100 mm, 1.8  $\mu$ m). An Agilent 6460 mass selective detector with an Agilent Jet Stream (AJS) (G1958-65138)

ion source (Agilent Technologies, Palo Alto, CA, USA) was used. Instrumental settings for the Agilent6460 mass selective detector included: gas temperature:350°C, gas flow:4l/min, sheath gas temperature: 350, sheath gas flow: 12 l/min, nebulizer pressure: 344.8 kPa, capillary voltage: 3500V, nozzle voltage: 0V in negative mode and 500V in positive mode. Nitrogen gas was used as the drying and collision gas for all LC–MS/MS instruments. Data analysis was performed using Agilent Mass Hunter B.02.01 software. Dopamine and serotonin were quantified by reference to external standards.

## **Pharmacological injection**

### **1) AMPT injection**

The  $\alpha$ -methyl-DL-tyrosine methyl ester hydrochloride (AMPT; Sigma-Aldrich), a competitive inhibitor of tyrosine hydroxylase, was previously used to deplete dopamine stores in insects (1). AMPT solution (80 $\mu$ g/ $\mu$ l) was directly injected into the thoracic hemocoels of gregarious nymphs via the abdomen by using a microsyringe ventrally between the second and third abdominal segments, with syringe needle' s tip in the thoracic hemocoel. We injected the volume 2 $\mu$ l to the third stadium and 4 $\mu$ l to the fourth stadium of gregarious nymphs successively at 48h intervals for 3 consecutive times. Control group received the same volume of ringer's solution as that of AMPT solution. Then 20 gregarious nymphs were put into the plastic box and cultured together (10cm $\times$ 10cm $\times$ 10cm).

### **2) Injection of reserpine**

Reserpine, a specific inhibitor of vesicle amine transporter in synapse (2) was dissolved in dimethylsulfoxide (DMSO; Sigma-Aldrich) to give concentration of 80 $\mu$ g/ $\mu$ l. 1 $\mu$ l of 80 $\mu$ g/ $\mu$ l reserpine or DMSO control was injected into thoracic hemocoels (same as AMPT injection) of the fourth-stadium gregarious nymphs. Then, 20 gregarious animals were returned into the plastic box (10cm $\times$ 10cm $\times$ 10cm) and allowed to recover for 48h before behavioral assay.

### **3) Injections of dopamine receptor antagonists**

Four different dopamine receptor antagonists, chlorpromazine (CPZ), SCH23390, raclopride and apokyn hydrate (Sigma-Aldrich), were administered individually to

monitor their effects on the behavior of gregarious nymphs. Chlorpromazine can cover all pharmacological types of dopamine receptor (3). SCH23390 is the selective antagonist of D1 dopamine receptor with minimal effects on D2 receptor. It can successfully block the action of dopamine receptor in several insects including locusts (4). Raclopride acts as an antagonist on D2 dopamine receptors in invertebrates (3). Apokyn hydrate is the non-selective dopamine receptor antagonist and widely used in vertebrates (5). 60ug of chlorpromazine (20 $\mu$ g/ $\mu$ l), 80 $\mu$ g of SCH23390 (20 $\mu$ g/ $\mu$ l), 80 $\mu$ g of raclopride (10 $\mu$ g/ $\mu$ l) and 80ug of apokyn hydrate (10 $\mu$ g/ $\mu$ l) were injected into thorax hemocoels of gregarious nymphs, respectively. Control group received the same volume of ringer's solution as that of antagonist solution. Then gregarious nymphs stayed in the rearing cage for 1h before behavioral assay.

#### **4) Dopamine injection**

Dopamine hydrochloride (dopamine hydrochloride, Sigma-Aldrich) was dissolved in ringer's solution. 2 $\mu$ l of 80 $\mu$ g/ $\mu$ l solution was injected into thorax hemocoels of solitary nymphs. Then, animals stayed for 1h in their rearing cages alone before behavior assay. Control animals received the corresponding volume of ringer's solution.

#### **5) Injections of dopamine receptor agonists**

S (+)-apomorphine was chosen to activate the action of dopamine receptor and investigate its roles in the behavior of solitary nymphs. S (+)-apomorphine is a non selective dopamine receptor agonist with high affinity for invertebrate dopamine receptor (6). 2 $\mu$ l apomorphine (10 $\mu$ g/ $\mu$ l) was injected into thorax hemocoels of the fourth-stadium solitary nymphs. Control animals received the same volume of ringer's solution. Then animals stayed for 1h in their rearing cages alone or 1h of crowding with 30 gregarious nymphs in cages (10cm $\times$ 10cm $\times$ 10cm) before behavior assay.

Long-term injection was also conducted to examine the chronic effects of apomorphine on the behavior of solitary nymphs. We gave 1  $\mu$ l apomorphine (10ug/ $\mu$ l) to the third-stadium solitary animals and 2  $\mu$ l to the fourth-stadium nymphs at 48h time intervals. Control animals received the same volume of ringer's solution. The

injected nymphs then live in crowding with 30 nymphs in cages (10cm×10cm×10cm) before behavior assay. Behavior assay was performed 24 h after the last injection.

#### **6) AMTP injection**

Systematic injection of  $\alpha$ -methyltryptophan(AMTP, Sigma-Aldrich), a competitive inhibitor of 5HT synthesis, was previously used to deplete 5HT stores in the desert locust (7). AMTP solution (80 $\mu$ g/ $\mu$ l) was directly injected into thoracic hemocoels of gregarious nymphs via the abdomen by using a microsyringe ventrally between the second and third abdominal segments, with syringe needle's tip in thoracic hemocoels. We injected 2 $\mu$ l to the third-stadium gregarious nymphs and 4 $\mu$ l to the fourth-stadium nymphs successively at 48h intervals for 3 consecutive times. Control group received the same volume of ringer's solution as that of AMTP. Then, 20 gregarious nymphs were put into the plastic box and cultured together in cages (10cm×10cm×10cm).

#### **7) Injections of serotonin receptor antagonists**

Two different selective serotonin receptor antagonists, ketanserin and methiothpin (Sigma-Aldrich), were used to cover the range of possible pharmacological types of serotonin receptor and investigate their effects on the behavior of gregarious nymphs. Ketanserin and methiothpin are the selective antagonists of serotonin receptor (7). The antagonist solution contained 20  $\mu$ g/ $\mu$ l of ketanserin and 20 $\mu$ g/ $\mu$ l of methiothpin in ringer's solution. 2 $\mu$ l of antagonist solution containing 20  $\mu$ g/ $\mu$ l of ketanserin and 20 $\mu$ g/ $\mu$ l of methiothpin was injected into gregarious nymphs. Then, nymphs were reared in cages for 1h before behavior assay.

#### **8) Injection of serotonin**

The fourth-stadium solitary nymphs were injected with 160ug serotonin (40 $\mu$ g/ $\mu$ l) or ringer saline control. Then, animals were reared alone in cages for 1h before their behavior was assayed.

#### **9) Injections of serotonin receptor agonist**

5HT receptor agonist cocktail containing  $\alpha$ -methylserotonin and 5-carboxamidotryptamine (5CT) that were successfully used in the desert locust (7) was used to activate the serotonergic pathways. Solitary nymphs were injected with

4 $\mu$ l of  $\alpha$ -methylserotonin (5 $\mu$ g/ $\mu$ l) and 5CT (5 $\mu$ g/ $\mu$ l) using the method as described above. Control insect received the same volume of ringer's solution. Then animals were reared alone in cages for 1h recovery before their behavior was assayed. Control animals received the same volume of control solution.

### **10) Injection of 5-HTP**

5-hydroxytryptophan (5-HTP), an intermediate product in serotonin metabolic pathway, is the rate-limiting factor for serotonin synthesis (7). Solitary nymphs were injected with 100 $\mu$ g 5-HTP (10 $\mu$ g/ $\mu$ l) or ringer's saline control, and animals were exposed 1h of crowding with 30 gregarious nymphs in cages (10cm $\times$ 10cm $\times$ 10cm) before behavior assay.

Long-term injection was also conducted to investigate the chronic impacts of 5-HTP on the behavior of solitary nymphs. We gave 5 $\mu$ l 5-HTP (10 $\mu$ g/ $\mu$ l) to the third-stadium solitary nymph and 10 $\mu$ l to the fourth-stadium nymphs at 48h intervals. Control animals received the same volume of ringer's solution. The injected nymphs then live in crowding with 30 nymphs in the cages (10cm $\times$ 10cm $\times$ 10cm) before behavior assay. Behavior assay was performed 24 h after the last injection.

### **RNA interference (RNAi)**

Primers were fused with T7 promoter sequence (underlined). We used sense primer 5'GGATCCTAATACGACTCACTATAGGTTCGCCATCAAGAAGTCCTAC3' and antisense primer 5'GGATCCTAATACGACTCACTATAGG TGAGGTGGTTGCA GTTGTCC 3' for *pale* clone and dsRNA preparation. For *ebony* clone and dsRNA preparation, the sense primer is 5' GGATCCTAATACGACTCACTATAGG GATTATTCTCGCCTCTACCG 3' and the anti-sense primer is 5'GGATCCTAATA CGACTCACTATAGGTCAACTTGGCATTACAGGA3'. The amplification product of *ebony* is 513bp. For clone and dsRNA preparation of vesicle monoamine transporter1 (*vat1*), the sense primer is 5'GATCCTAATACGACTCACTATAGGAT GGCAGTTTCAGCAAGA 3' and the antisense primer is 5' GGATCCTAATACGAC TCACTATAGGCTCCACCTCCGATTGACT3'. Resulting products of *pale*, *ebony* and *vat1* excluding the fused T7 promoter is 733bp, 513bp and 432bp respectively. Green fluorescence protein (GFP) was used as RNAi control. The sense primer 5'

GATCCTAATACGACTCACTATAGGCACAAGTTCAGCGTGTCCG3' and antisense primer 5' GGATCCTAATACGACTCACTATAGGGTTCACCTTGATGCGTTC 3' were used for GFP dsRNA preparation. The final product of GFP excluding the fused T7 promoter is 420bp. The sense primer and antisense primer of *henna* for RNAi are 5' GGATCCTAATACGACTCACTATAGG ACTCGCCAAATGCCTCAA3' and 5'GGATCCTAATACGACTCACTATAGGACACGGAAAGCCAACCCT 3', respectively, and the length of the amplified product is 534bp. The sense primer and antisense primer of *dopamine receptor D1* for RNAi are 5'GGATCCTAATACGACTCACTATAGGCTCCGTGGGTAAATGAAGACT3' and 5'GGATCCTAATACGACTCACTATAGGATAACACTCACACTTGCCGAT3', the length of the amplified product is 785bp. PCR products were purified using QIAquick PCR purification kit (Qiagen, Valencia, United States). RNA was prepared using the Promega RiboMax T7 system (Promega, Wisconsin, United States) and annealed by incubation at 70°C for 10 min followed by slow cooling to room temperature. All RNA products were extracted with phenol/chloroform and precipitated with ethanol. The integrity of dsRNA was confirmed using 1% agarose gels and the dsRNA products were diluted with nuclease-free Ringer solution to the final concentration of 6µg/µl. Needles were baked to remove RNase. 2µl dsRNA of target gene or GFP control was injected into the thoracic hemocoels of the third-stadium gregarious nymphs at 48h intervals for 3 consecutive times. dsRNA-injected nymphs were raised in crowding form with the population size of 20 in cages (10cm×10cm×10cm). Behavior and body color were analyzed in the fourth stadium. The efficiency of RNAi in target genes was validated by quantitative PCR.



## References

1. Pendleton RG, et al. (2005) A developmental role for catecholamines in *Drosophila* behavior. *Pharmacol Biochem Behav* 81:849-853.
2. Metzger RR, et al. (2002) Inhibitory effect of reserpine on dopamine transporter function. *Eur J Pharmacol* 456: 39-43.
3. Degen J, Gewecke M, Roeder T (2000) The pharmacology of a dopamine receptor in the locust nervous tissue. *Eur J Pharmacol* 396: 59-65.
4. Yellman C, Tao H, He B, Hirsh J (1997) Conserved and sexually dimorphic behavioral responses to biogenic amines in decapitated *Drosophila*. *Proc Natl Acad Sci USA* 94:4131–4136.
5. Usiello A, et al. (2000) Distinct functions of the two isoforms of dopamine D2 receptors. *Nature* 408:199-203.
6. Torres G, Horowitz J M (1998) Activating properties of cocaine and cocaethylene in a behavioral preparation of *Drosophila melanogaster*. *Synapse* 29:148-161.
7. Anstey ML, Rogers SM, Ott SR, Burrows M, Simpson SJ (2009) Serotonin mediates behavioral gregarization underlying swarm formation in desert locusts. *Science* 323:627-630.

**Fig.S1**

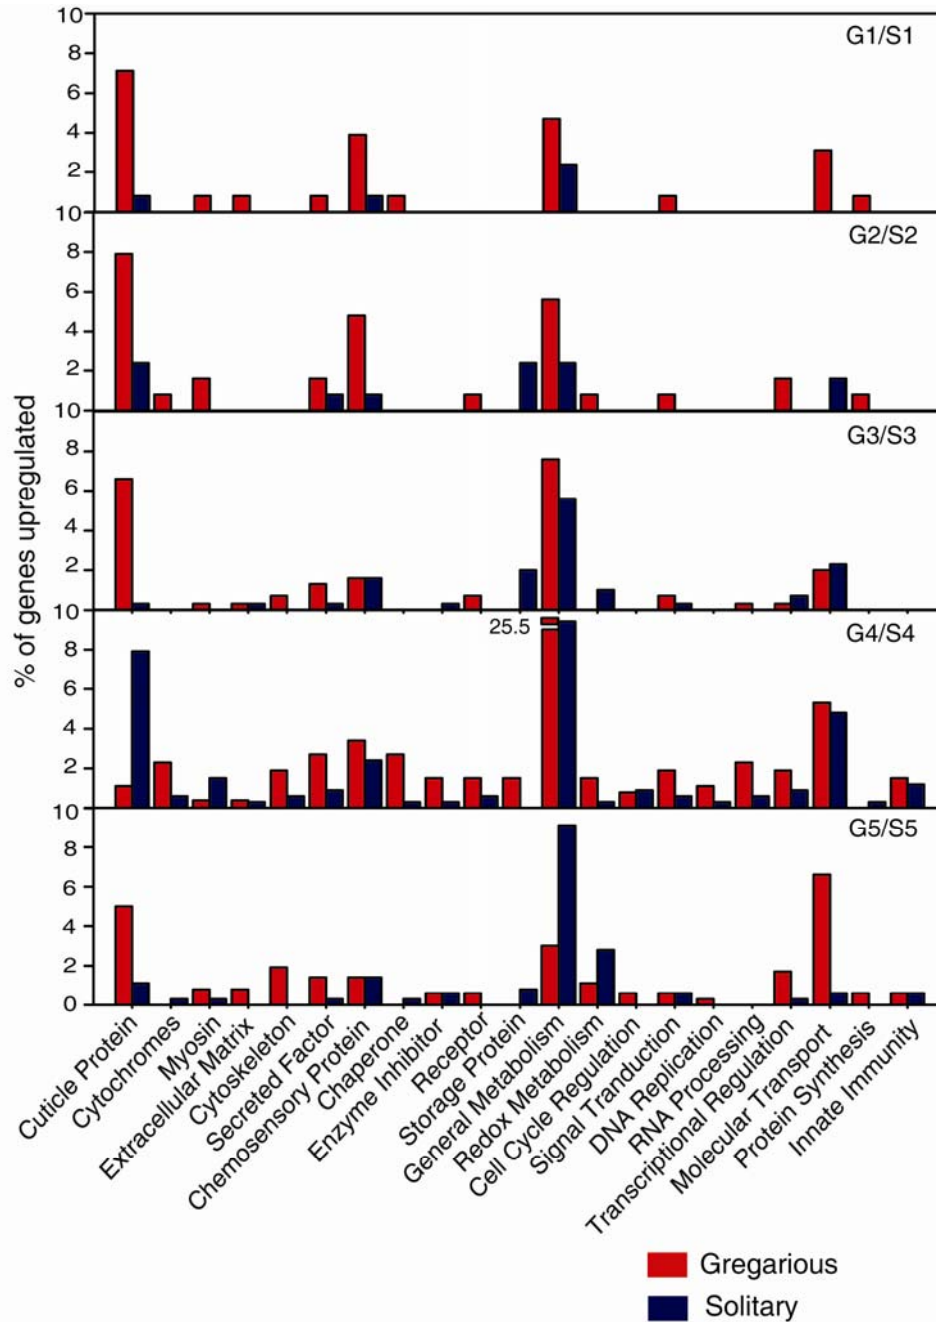

**Fig.S1.** Functional classification of differentially expressed genes in pair wise comparison between two phases of locust nymphs. The classification is based on gene ontology data and a homology search using BLAST data in NCBI and functional domains in InterPro. S, solitary phase. G, gregarious phase. Numbers 1-5, larval stadia.

**Fig.S2**

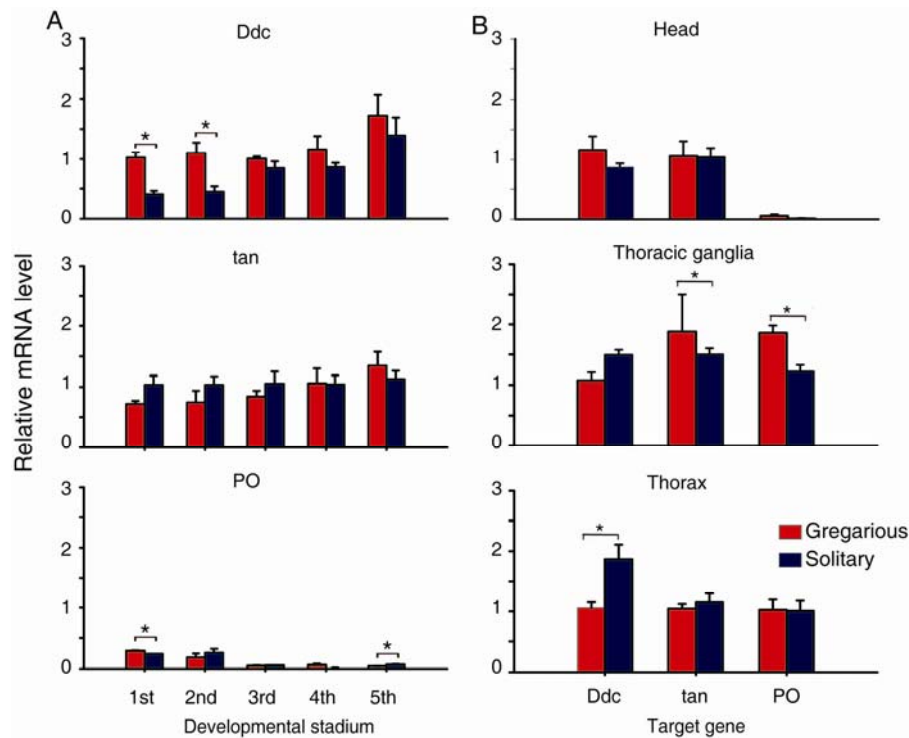

**Fig.S2.** The temporal and spatial expression of genes involved in dopamine metabolism analyzed by qPCR. (A) The temporal and spatial expression of genes in the head part of solitary and gregarious nymphs analyzed by qPCR. (B) The spatial expression of genes involved in dopamine metabolism in the head, thorax and thoracic ganglia of the fourth-stadium solitary and gregarious nymphs analyzed by qPCR. Asterisk indicates statistically significant change (mean + SE) ( $p < 0.05$ , Student's t-test). Abbreviations: Ddc, Dopa decarboxylase; PO, Phenoloxidase.

**Fig.S3**

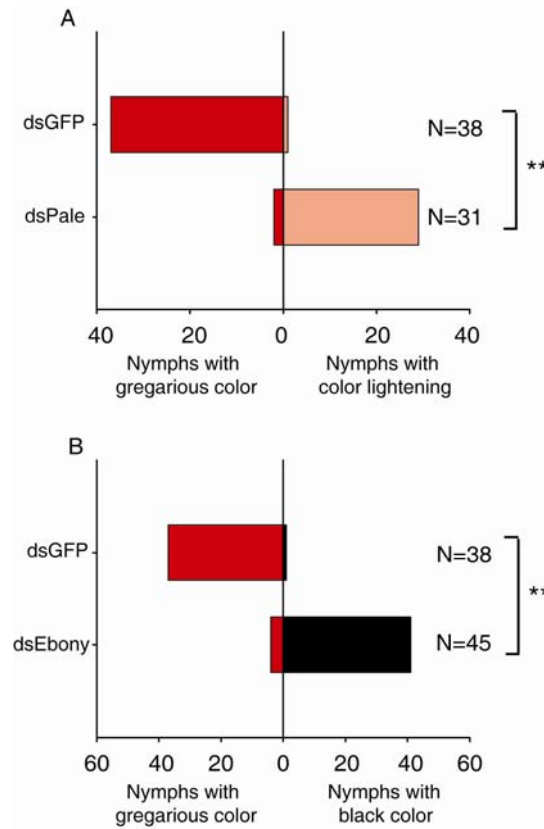

**Fig.S3.** The number of nymphs showing color changes after dsRNA injection. Gregarious nymphs show lightening (A) and black (B) color changes after being injected with dsPale (A) and dsEbony (B), respectively (*Mann-Whitney U test*,  $p < 0.001$ , relative to dsGFP-injected groups).

**Fig.S4**

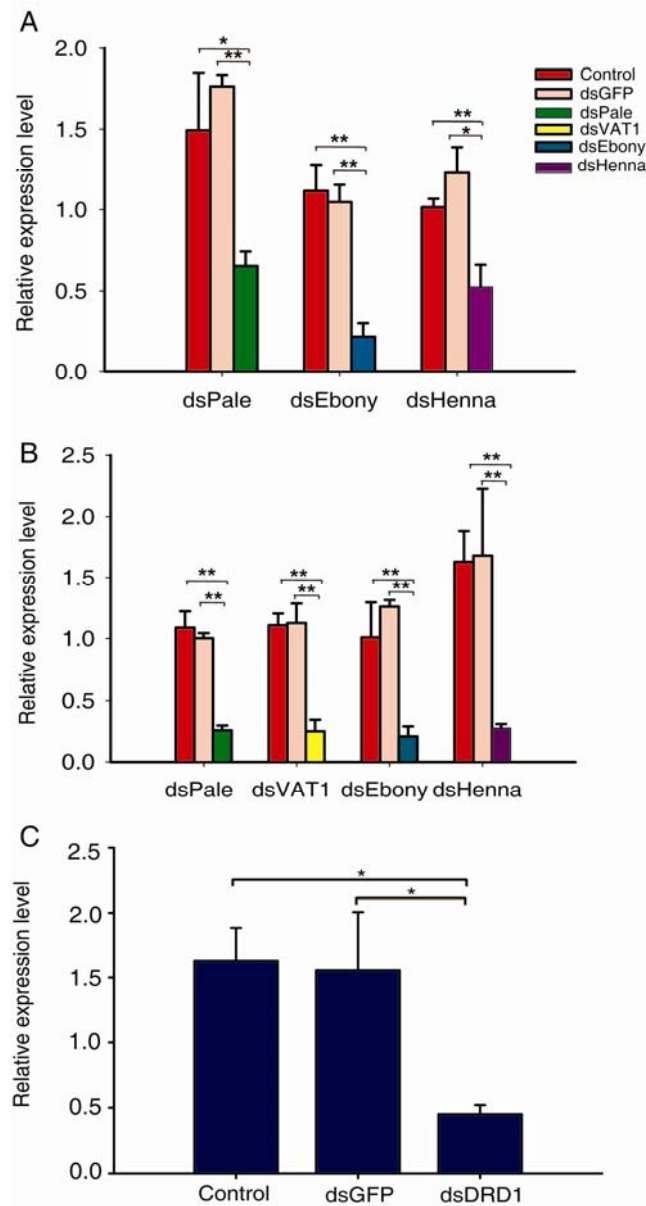

**Fig.S4.** The injection of dsRNA reduces expression level of target genes in catecholamine metabolic pathway in the fourth-stadium gregarious nymphs.

(A) *pale*, *ebony* and *henna* reduce the expression levels in the thorax part. (B) *pale*, *ebony*, *henna*, *VAT1*, and (C) *DRD1* reduced the expression levels in the head part.

Asterisks show statistically significant differences between means (mean + SE) ( $*p < 0.05$ ,  $**p < 0.01$ , Student's t-test). Abbreviations: RNAi, RNA interference; dsRNA, double-stranded RNA; *VAT1*, vesicle amine transporter 1; *DRD1*, dopamine receptor D1.

**Fig.S5**

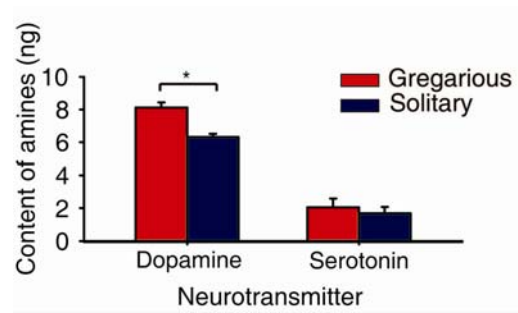

**Fig.S5.** The amount of dopamine and serotonin in the brain tissues of the fourth-stadium solitary or gregarious nymphs. Asterisk shows statistically significant differences between means (mean + SE) ( $p < 0.05$ , Student's t-test).

**Fig.S6**

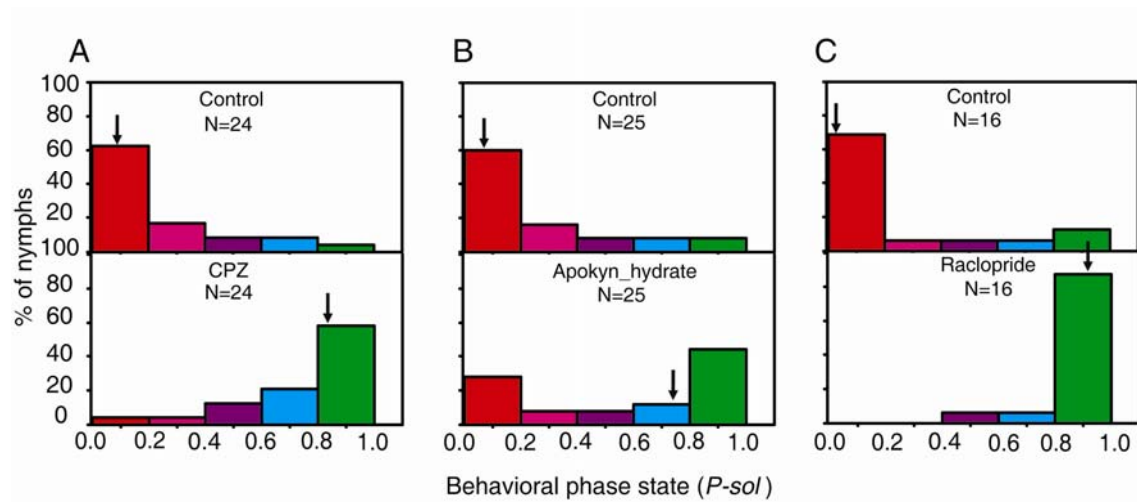

**Fig.S6.** Drug interferences in dopamine and serotonin signaling induce the behavioral solitarization in gregarious nymphs. The fourth-stadium gregarious nymphs injected with antagonists of dopamine receptor (A) CPZ (60 $\mu$ g), (B) raclopride (80 $\mu$ g) and (C) apokyn hydrate (80 $\mu$ g) at a 1h interval show behavioral solitarization. Saline controls are shown in the upper column (*Mann-Whitney U test*,  $p < 0.01$ , relative to control groups). The arrows denote median *P-sol* values of the population. Abbreviation: CPZ, Chlorpromazine.

**Fig. S7**

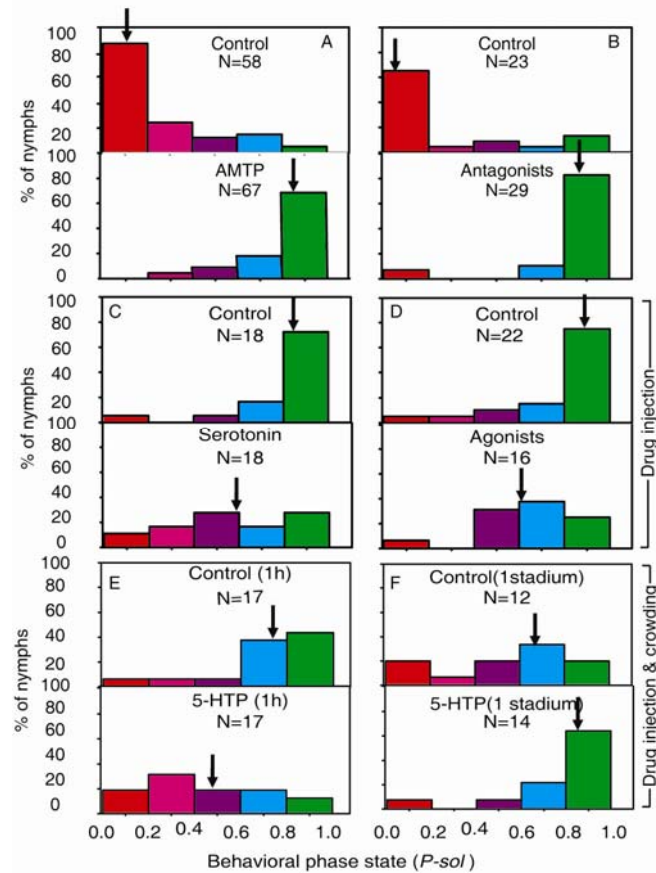

**Fig.S7.** Behavioral responses of gregarious and solitary nymphs to serotonin biosynthesis and receptor signaling. (A) The third-stadium gregarious nymphs injected with AMTP ( $80\mu\text{g}/\mu\text{l}$ ), an inhibitor of serotonin synthesis, exhibit behavioral solitarization. (B) Behavior of fourth-stadium gregarious nymphs injected with the mixture of antagonists (ketanserin ( $40\mu\text{g}$ ) and methiothepin ( $40\mu\text{g}$ )) at a 1h interval. Direct injection of (C) serotonin ( $80\mu\text{g}/\mu\text{l}$ ) or (D) a mixture of serotonin receptor agonists ( $\alpha$ -methylserotonin,  $5\mu\text{g}/\mu\text{l}$  and 5-carboximidotryptamine,  $5\mu\text{g}/\mu\text{l}$ ) also partially induced gregarization of solitary nymphs. (E) The fourth-stadium solitary nymphs injected with 5-HTP ( $100\mu\text{g}/\mu\text{l}$ ) and exposed to 1h of crowding showed gregarious behavior. (F) The third-stadium solitary nymphs injected with 5-HTP ( $100\mu\text{g}/\mu\text{l}$ ) and exposed to one stadium of crowding. All statistical analyses were conducted with *Mann-Whitney U test* relative to control groups ( $p < 0.05$ ).



**Table S1.** Behavioral variables in the best-fit logistic regression model obtained from five stadia of locust nymphs. This table indicates significance levels of the individual parameter for the behavioral discrimination of the locust nymphs in corresponding stadia. Attraction index (AI, AI stands for the extent of the tested animal attracted by stimulus group. Total duration in stimulus area, in the opposite of the stimulus area and in the middle area was weighted by 1, -1 and 0, respectively.  $AI = 1 \times \text{total duration in stimulus area} + (-1) \times \text{total duration in the opposite of stimulus area} + 0 \times \text{total duration in middle area}$ ). Abbreviations: AI, attraction index; EFISA, entry frequency in the stimulus area; FOM, frequency of movement; TDCW, total duration in area close to the wall; TDMV, total duration of movement; TDM, total distance moved; G, gregarious phase; S, solitary phase.

|         |     | Number of Nymphs for Behavioral Model | Model                  |         |       |        |    |        |                | Model if Term Removed |                             |                    |
|---------|-----|---------------------------------------|------------------------|---------|-------|--------|----|--------|----------------|-----------------------|-----------------------------|--------------------|
| Stadium | G   | S                                     | Parameters in equation | $\beta$ | S.E.  | Wald   | df | Sig.   | Exp( $\beta$ ) | Model Log Likelihood  | Change in -2 Log Likelihood | Sig. of the Change |
| 1st     | 60  | 60                                    | TDM                    | 0.027   | 0.009 | 0.459  | 1  | 0.002  | 1.027          | -74.201               | 10.743                      | 0.001              |
|         |     |                                       | FOM                    | -0.316  | 0.095 | 11.065 | 1  | 0.001  | 0.729          | -101.234              | 64.808                      | <0.000             |
|         |     |                                       | Constant               | -0.928  | 0.451 | 4.240  | 1  | 0.039  | 0.395          |                       |                             |                    |
| 2nd     | 60  | 60                                    | TDMV                   | -0.052  | 0.013 | 14.794 | 1  | <0.000 | 0.950          | -73.949               | 35.077                      | <0.000             |
|         |     |                                       | TDCW                   | -0.008  | 0.003 | 8.774  | 1  | 0.003  | 0.992          | -61.483               | 10.145                      | 0.001              |
|         |     |                                       | Constant               | 1.415   | 0.318 | 19.804 | 1  | <0.000 | 4.118          |                       |                             |                    |
| 3rd     | 66  | 60                                    | FOM                    | -0.099  | 0.020 | 25.068 | 1  | <0.000 | 0.905          | -89.558               | 12.010                      | <0.000             |
|         |     |                                       | TDCW                   | 0.007   | 0.003 | 5.226  | 1  | 0.022  | 1.007          | 56.749                | 6.363                       | 0.011              |
|         |     |                                       | EFISA                  | 0.208   | 0.083 | 6.303  | 1  | 0.012  | 1.232          | 56.410                | 5.713                       | 0.017              |
|         |     |                                       | Constant               | 1.192   | 0.339 | 12.391 | 1  | <0.000 | 3.295          |                       |                             |                    |
| 4th     | 100 | 100                                   | TDM                    | -0.016  | 0.005 | 11.319 | 1  | 0.001  | 0.984          | -68.549               | 13.431                      | <0.000             |
|         |     |                                       | TDMV                   | -0.014  | 0.006 | 4.561  | 1  | 0.033  | 0.986          | -64.458               | 5.248                       | 0.022              |
|         |     |                                       | AI                     | -0.005  | 0.001 | 12.162 | 1  | <0.000 | 0.995          | -69.114               | 14.560                      | <0.000             |
|         |     |                                       | Constant               | 2.428   | 0.377 | 41.393 | 1  | <0.000 | 11.332         |                       |                             |                    |
| 5th     | 100 | 100                                   | TDMV                   | -0.077  | 0.023 | 11.041 | 1  | 0.001  | 0.926          | -62.67                | 33.026                      | <0.000             |
|         |     |                                       | TDCW                   | -0.012  | 0.004 | 8.584  | 1  | 0.003  | 0.988          | -51.208               | 10.043                      | 0.002              |
|         |     |                                       | AI                     | -0.008  | 0.002 | 18.881 | 1  | <0.000 | 0.992          | -60.244               | 28.115                      | <0.000             |
|         |     |                                       | Constant               | 2.731   | 0.477 | 32.747 | 1  | <0.000 | 15.347         |                       |                             |                    |

**Table S2.** The amount of differentially expressed genes in the pare-wised comparison between solitary and gregarious phase. S, solitary phase. G, gregarious phase. Numbers 1-5, larval stadia.

| Pare wise comparison | Up regulated (gregarious) | Up regulated (solitary) | Total |
|----------------------|---------------------------|-------------------------|-------|
| <b>G1/S1</b>         | 111                       | 16                      | 127   |
| <b>G2/S2</b>         | 103                       | 23                      | 126   |
| <b>G3/S3</b>         | 165                       | 139                     | 304   |
| <b>G4/S4</b>         | 331                       | 263                     | 594   |
| <b>G5/S5</b>         | 106                       | 259                     | 365   |

**Table S3.** The upregulated genes in general metabolism category in the pare-wised comparison between two phases in the fourth-stadium nymphs.

| Gene_ID                        | Annotation                                                    | Ratio(Log2 (G/S)) | Pvalue   |
|--------------------------------|---------------------------------------------------------------|-------------------|----------|
| <b>Carbohydrate metabolism</b> |                                                               |                   |          |
| LM01578                        | Pyruvate dehydrogenase E1 component alpha subunit type II     | 2.13              | 6.77E-07 |
| LM02028                        | Alpha-galactosidase A precursor                               | 0.87              | 3.68E-04 |
| LM03873                        | Alpha-galactosidase A precursor                               | 0.79              | 3.71E-04 |
| LM07103                        | 6-phosphofructo-2-kinase/fructose-2,6-biphosphatase 4         | 0.86              | 8.64E-06 |
| LM09139                        | UDP-N-acetylhexosamine pyrophosphorylase                      | 1.19              | 9.02E-06 |
| <b>Chitin metabolism</b>       |                                                               |                   |          |
| LM03161                        | Peritrophin-1 precursor                                       | 0.84              | 4.37E-04 |
| LM03419                        | Gasp                                                          | 0.65              | 5.02E-04 |
| LM03818                        | Peritrophin-A                                                 | 0.75              | 7.98E-04 |
| LM03991                        | Gasp                                                          | 1.23              | 3.25E-06 |
| <b>Dopa metabolism</b>         |                                                               |                   |          |
| LM01233                        | Tyrosine hydroxylase(Pale)                                    | 1.92              | 2.71E-08 |
| LM01742                        | Tan                                                           | 0.64              | 1.01E-03 |
| LM03547                        | Phenylalanine-4-hydroxylase/Tryptophan 5-monoxygenase(Henna)  | 1.48              | 4.87E-07 |
| LM06090                        | Ebony                                                         | 1.04              | 1.90E-07 |
| LM06555                        | Ebony                                                         | 1.01              | 9.64E-05 |
| LM06559                        | Phenylalanine-4-hydroxylase/Tryptophan 5-monoxygenase(Henna)  | 1.10              | 1.16E-06 |
| <b>Lipid metabolism</b>        |                                                               |                   |          |
| LM02273                        | Triacylglycerol lipase                                        | 1.36              | 5.76E-05 |
| LM06045                        | 1-acyl-sn-glycerol-3-phosphate acyltransferase alpha          | 0.87              | 9.41E-04 |
| LM07113                        | Elongation of very long chain fatty acids protein 1 (CGI-88)  | 1.62              | 6.77E-07 |
| LM08075                        | Elongation of very long chain fatty acids 4 protein           | 0.93              | 1.52E-04 |
| <b>Others</b>                  |                                                               |                   |          |
| LM00470                        | Glutamine synthetase                                          | 0.92              | 8.83E-06 |
| LM00565                        | Bifunctional 3'-phosphoadenosine 5'-phosphosulfate synthetase | 1.09              | 2.73E-06 |
| LM01578                        | Pyruvate dehydrogenase E1 component alpha subunit type II     | 2.13              | 6.77E-07 |
| LM01902                        | CG31973-PA                                                    | 1.04              | 1.22E-05 |
| LM02240                        | IPR002057:Isopenicillin N synthetase                          | 1.46              | 1.76E-06 |
| LM03179                        | Lysozyme precursor (1,4-beta-N-acetylmuramidase)              | 0.98              | 4.07E-04 |
| LM03688                        | CG7532-PA                                                     | 2.39              | 0        |
| LM03833                        | 15-hydroxyprostaglandin dehydrogenase                         | 0.86              | 3.54E-04 |
| LM05365                        | Xaa-Pro dipeptidase                                           | 1.21              | 1.38E-06 |
| LM06588                        | ENSANGP00000011013                                            | 1.25              | 4.87E-07 |
| LM06873                        | Matrix metalloproteinase-14 precursor                         | 2.49              | 0        |
| LM07242                        | Thyroid peroxidase precursor (TPO)                            | 0.83              | 1.76E-04 |
| LM07798                        | IPR000834:Peptidase M14, carboxypeptidase A                   | 1.00              | 3.53E-04 |
| LM09139                        | UDP-N-acetylhexosamine pyrophosphorylase                      | 1.19              | 9.02E-06 |

**Table S4.** The list of upregulated gene functional categories in the fourth-stadium gregarious nymphs analyzed by Fisher's test ( $p < 0.05$ ).

| GO_ID                     | GO-Term                                             | Pvalue   |
|---------------------------|-----------------------------------------------------|----------|
| <b>Biological Process</b> |                                                     |          |
| GO:0042423                | catecholamine biosynthetic process                  | 2.85E-03 |
| GO:0006584                | catecholamine metabolic process                     | 2.85E-03 |
| GO:0018958                | phenol metabolic process                            | 2.85E-03 |
| GO:0042398                | amino acid derivative biosynthetic process          | 6.76E-03 |
| <b>Molecular Function</b> |                                                     |          |
| GO:0042302                | structural constituent of cuticle                   | 0.00E+00 |
| GO:0005198                | structural molecule activity                        | 2.12E-12 |
| GO:0005351                | sugar:hydrogen ion symporter activity               | 1.16E-04 |
| GO:0030246                | carbohydrate binding                                | 4.34E-04 |
| GO:0005214                | structural constituent of chitin-based cuticle      | 5.54E-04 |
| GO:0051119                | sugar transmembrane transporter activity            | 9.48E-04 |
| GO:0016714                | oxidoreductase activity                             | 9.71E-04 |
| GO:0008061                | chitin binding                                      | 1.10E-03 |
| GO:0015144                | carbohydrate transmembrane transporter activity     | 1.48E-03 |
| GO:0030247                | polysaccharide binding                              | 1.53E-03 |
| GO:0015291                | secondary active transmembrane transporter activity | 1.56E-03 |
| GO:0008643                | carbohydrate transport                              | 2.17E-03 |
| GO:0001871                | pattern binding                                     | 2.31E-03 |
| GO:0004099                | chitin deacetylase activity                         | 2.85E-03 |
| GO:0015293                | symporter activity                                  | 4.08E-03 |
| GO:0005355                | glucose transmembrane transporter activity          | 5.59E-03 |
| GO:0015145                | monosaccharide transmembrane transporter activity   | 9.13E-03 |
| GO:0015149                | hexose transmembrane transporter activity           | 9.13E-03 |
| <b>Cellular Component</b> |                                                     |          |
| GO:0005576                | extracellular region                                | 6.94E-04 |
| GO:0005865                | striated muscle thin filament                       | 9.13E-03 |

**Table S5** The list of upregulated gene functional categories in the fourth-stadium solitary nymphs analyzed by Fisher's test ( $p < 0.05$ ).

| GO_ID                     | GO-Term                                          | Pvalue   |
|---------------------------|--------------------------------------------------|----------|
| <b>Biological Process</b> |                                                  |          |
| GO:0032787                | monocarboxylic acid metabolic process            | 3.60E-04 |
| GO:0006090                | pyruvate metabolic process                       | 4.69E-04 |
| GO:0044262                | cellular carbohydrate metabolic process          | 1.42E-03 |
| GO:0006723                | cuticle hydrocarbon biosynthetic process         | 1.68E-03 |
| GO:0042811                | pheromone biosynthetic process                   | 1.68E-03 |
| GO:0042810                | pheromone metabolic process                      | 1.68E-03 |
| GO:0006082                | organic acid metabolic process                   | 3.18E-03 |
| GO:0019752                | carboxylic acid metabolic process                | 3.18E-03 |
| GO:0008652                | amino acid biosynthetic process                  | 6.50E-03 |
| GO:0006006                | glucose metabolic process                        | 6.71E-03 |
| GO:0006081                | aldehyde metabolic process                       | 8.77E-03 |
| GO:0006096                | glycolysis                                       | 9.43E-03 |
| GO:0006334                | nucleosome assembly                              | 9.53E-03 |
| <b>Molecular Function</b> |                                                  |          |
| GO:0016903                | oxidoreductase activity, acting on the aldehyde  | 1.06E-04 |
| GO:0016717                | oxidoreductase activity, acting on paired donors | 2.63E-04 |
| GO:0004768                | stearyl-CoA 9-desaturase activity                | 2.63E-04 |
| GO:0016620                | oxidoreductase activity                          | 7.15E-04 |
| GO:0016491                | oxidoreductase activity                          | 9.87E-04 |
| GO:0004478                | methionine adenosyltransferase activity          | 1.68E-03 |
| GO:0030955                | potassium ion binding                            | 2.10E-03 |
| GO:0031420                | alkali metal ion binding                         | 3.26E-03 |
| GO:0005344                | oxygen transporter activity                      | 6.58E-03 |
| GO:0004263                | chymotrypsin activity                            | 9.53E-03 |
| <b>Cellular Component</b> |                                                  |          |
| GO:0005811                | lipid particle                                   | 3.62E-03 |
| GO:0005788                | endoplasmic reticulum lumen                      | 4.74E-03 |
| GO:0000786                | nucleosome                                       | 4.90E-03 |
